# Supplementary material
Source: ML conference proceedings conference paper supplement (https://openreview.net/forum?id=8wIgDG87jn)
Supplement: supplementary_material [file attachment]

# HUI-Test

123456

afafjaklfjl

hui
