# Supplementary material
Source: ML conference proceedings conference paper supplement (https://openreview.net/forum?id=8wIgDG87jn)
Supplement: supplementary_material [file attachment]

## 某地增值税电子普通发票

发票代码: 00100210001

发票号码: 07099363

开票日期: 2023年02月03日

校验码: 10014 32002 33198 00000

机器编号: 499090000000

|                     |                            |           |    |     |        |                               |     |        |  |
|---------------------|----------------------------|-----------|----|-----|--------|-------------------------------|-----|--------|--|
| 购买方                 | 名称: 北京AI科技有限公司             |           |    |     | 密码区    | 0000-6/335*//3-<7+*10/9-85067 |     |        |  |
|                     | 纳税人识别号: 91011111AA2AAAAA00 |           |    |     |        | 07-*123<><>8000087*<64>4<8*-  |     |        |  |
|                     | 地址、电话:                     |           |    |     |        | 91->1*112000>7193+-7<474>/07  |     |        |  |
|                     | 开户行及账号:                    |           |    |     |        | 24-004*96-012>9819<<>97>>000  |     |        |  |
|                     |                            |           |    |     |        |                               |     |        |  |
| 货物或应税劳务、服务名称        |                            | 规格型号      | 单位 | 数 量 | 单 价    | 金 额                           | 税率  | 税 额    |  |
| *餐饮服务*餐饮服务          |                            |           |    | 1   | 379.25 | 379.25                        | 6%  | 22.75  |  |
| *日用杂品*灵感保温袋         |                            |           |    | 1   | 8.85   | 8.85                          | 13% | 1.15   |  |
| 合 计                 |                            |           |    |     |        | ¥388.10                       |     | ¥23.90 |  |
| 价税合计 (大写)           |                            | ⊗ 肆佰壹拾贰圆整 |    |     |        | (小写) ¥412.00                  |     |        |  |
| 销售方                 | 名称: 深圳蛋糕餐饮有限公司             |           |    |     | 备注     |                               |     |        |  |
|                     | 纳税人识别号: 911100008000000000 |           |    |     |        |                               |     |        |  |
| 地址、电话: 深圳市南山区成功大厦B座 |                            |           |    |     |        |                               |     |        |  |
| 开户行及账号: 中国银行深圳支行    |                            |           |    |     |        |                               |     |        |  |

收款人: 小明

复核: 小蔡

开票人: 小红

销售方: (章)
