# Supplementary material
Source: ML conference proceedings conference paper supplement (https://openreview.net/forum?id=8wIgDG87jn)
Supplement: supplementary_material [file example.xlsx]

## Sheet: Sheet1
Question	Answer
Which facial cleanser is good for oily skin?	ABC cleanser is preferred by many with oily skin.
Is L'Oreal good to use?	L'Oreal is a popular brand with many positive reviews.
