# Supplementary material
Source: ML conference proceedings conference paper supplement (https://openreview.net/forum?id=8wIgDG87jn)

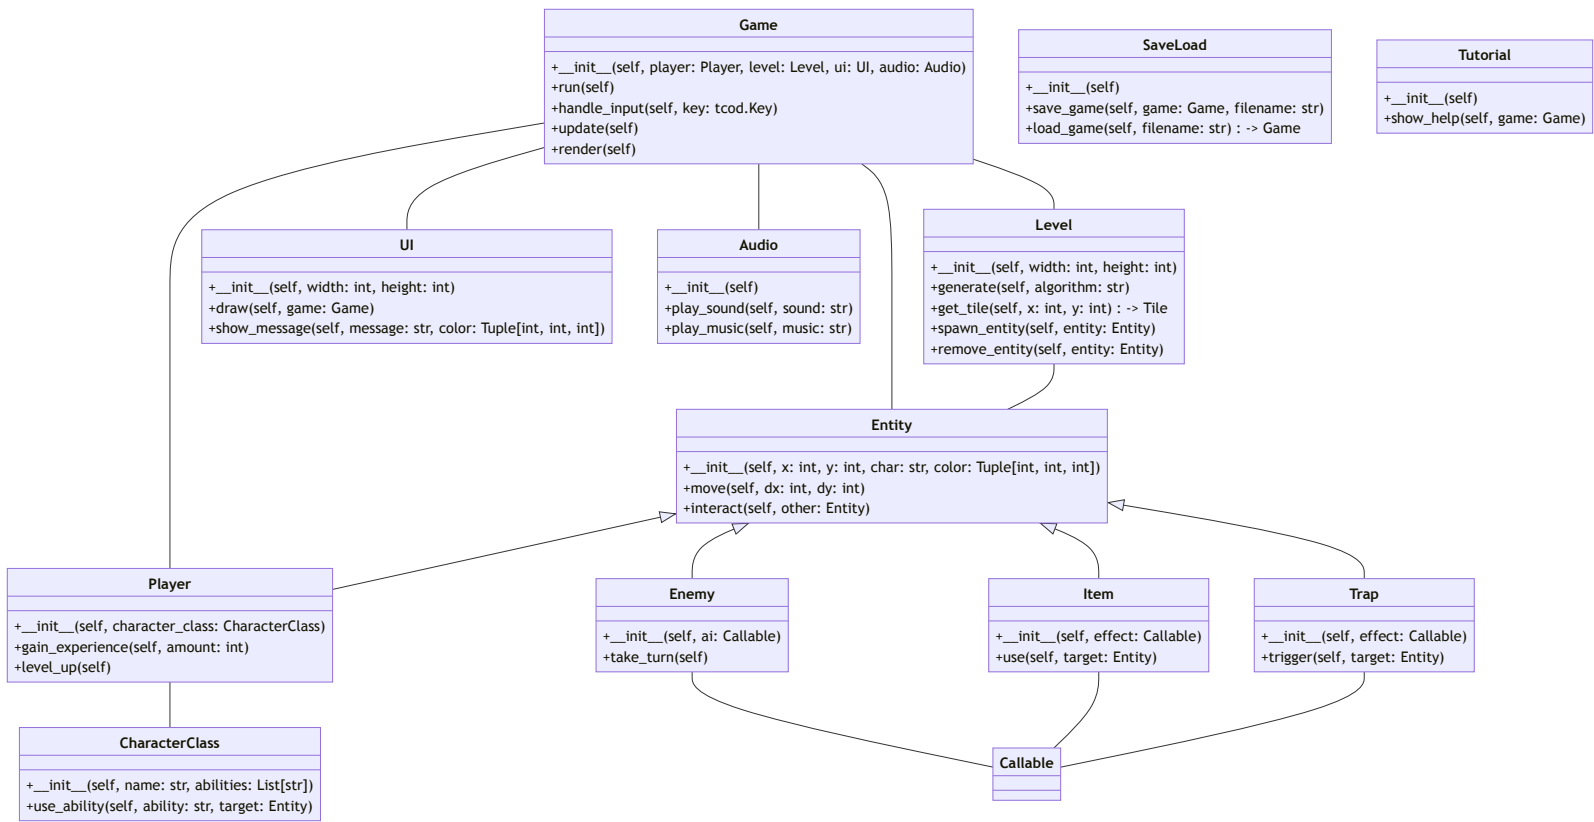

Supplement: supplementary_material [file attachment]

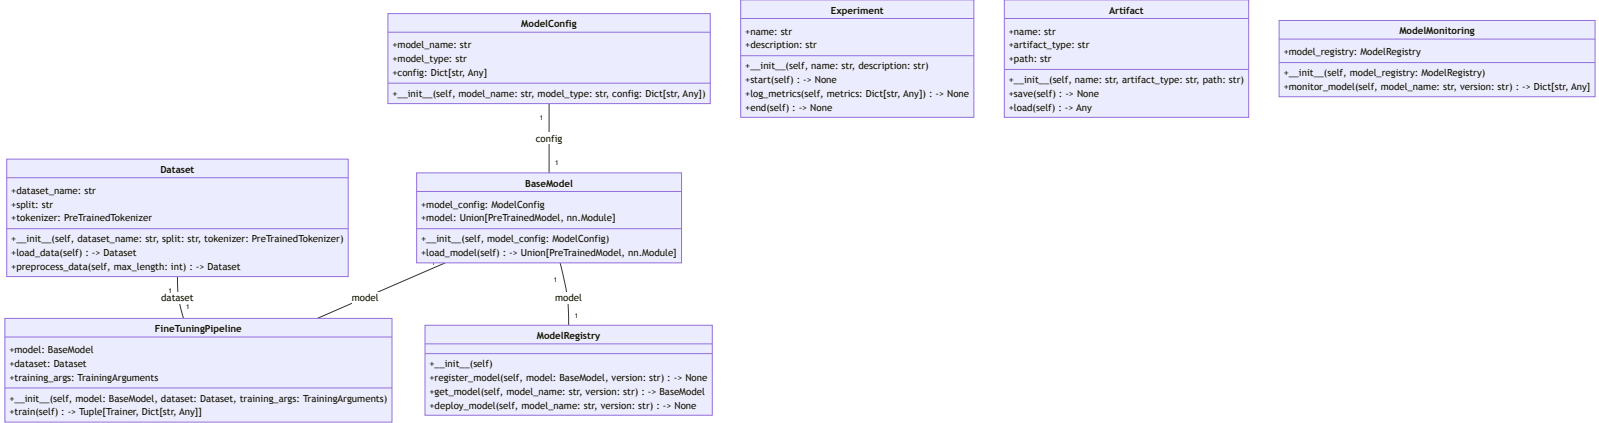

Supplement: supplementary_material [file attachment]

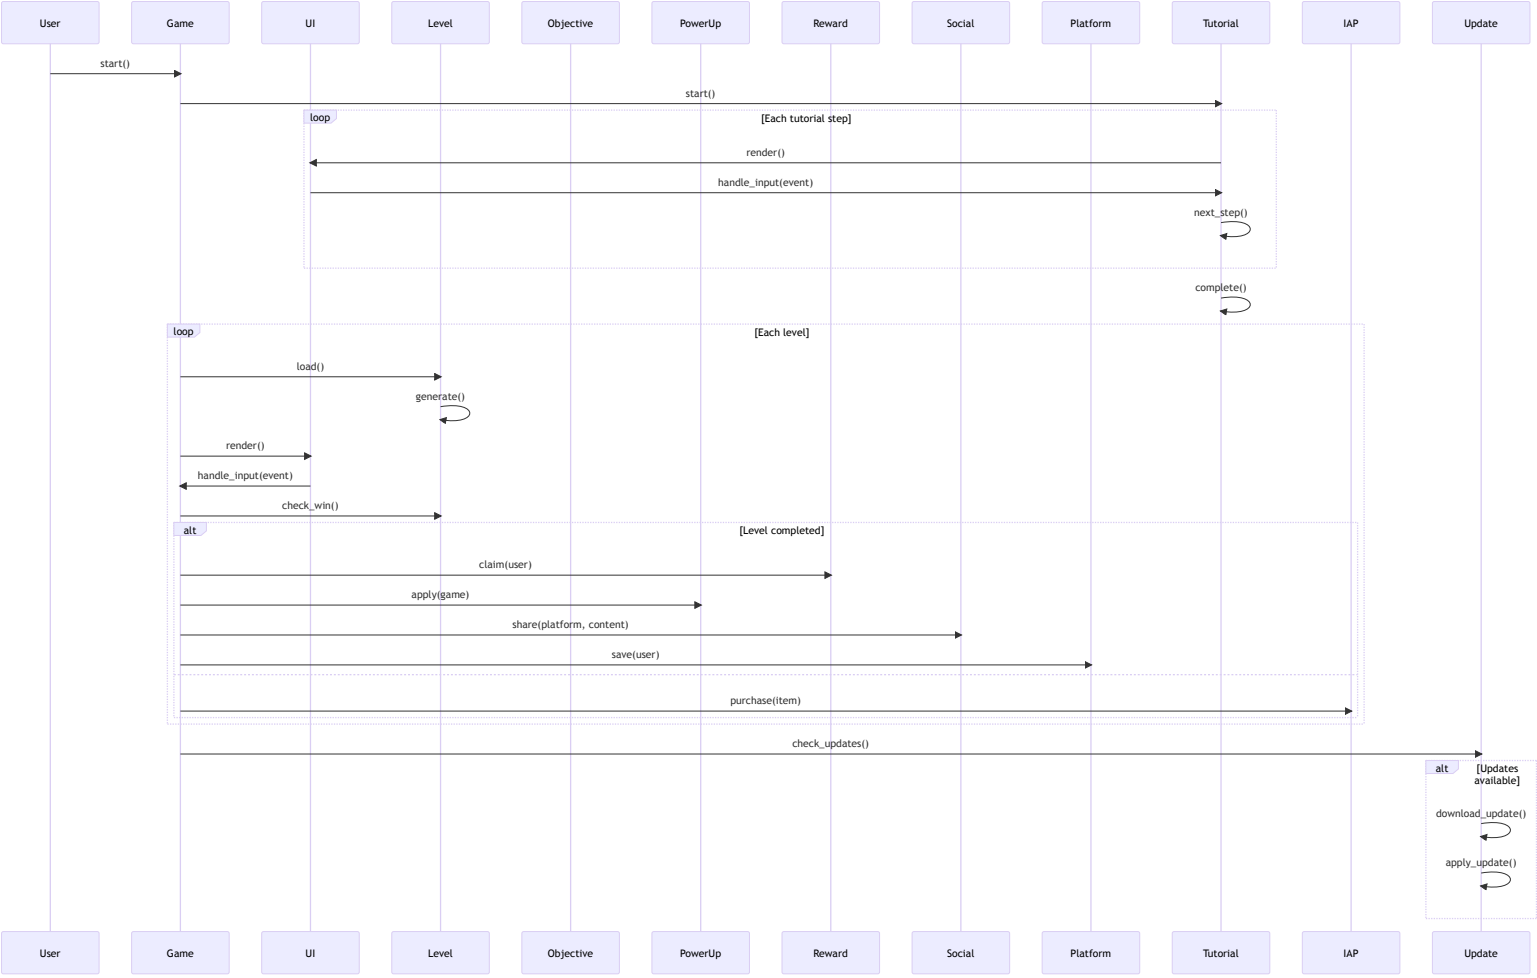

Supplement: supplementary_material [file attachment]

# Search Algorithm Frameworks: Accuracy vs Speed

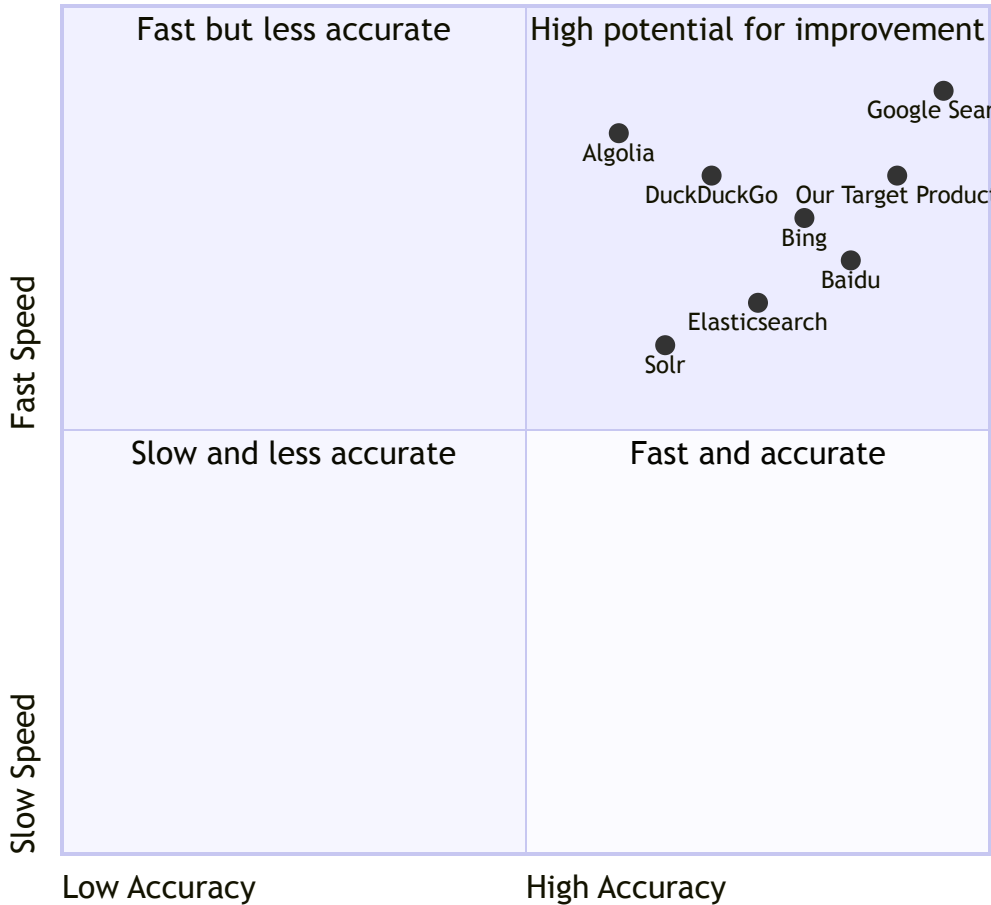

Supplement: supplementary_material [file attachment]

Reach and engagement of campaigns

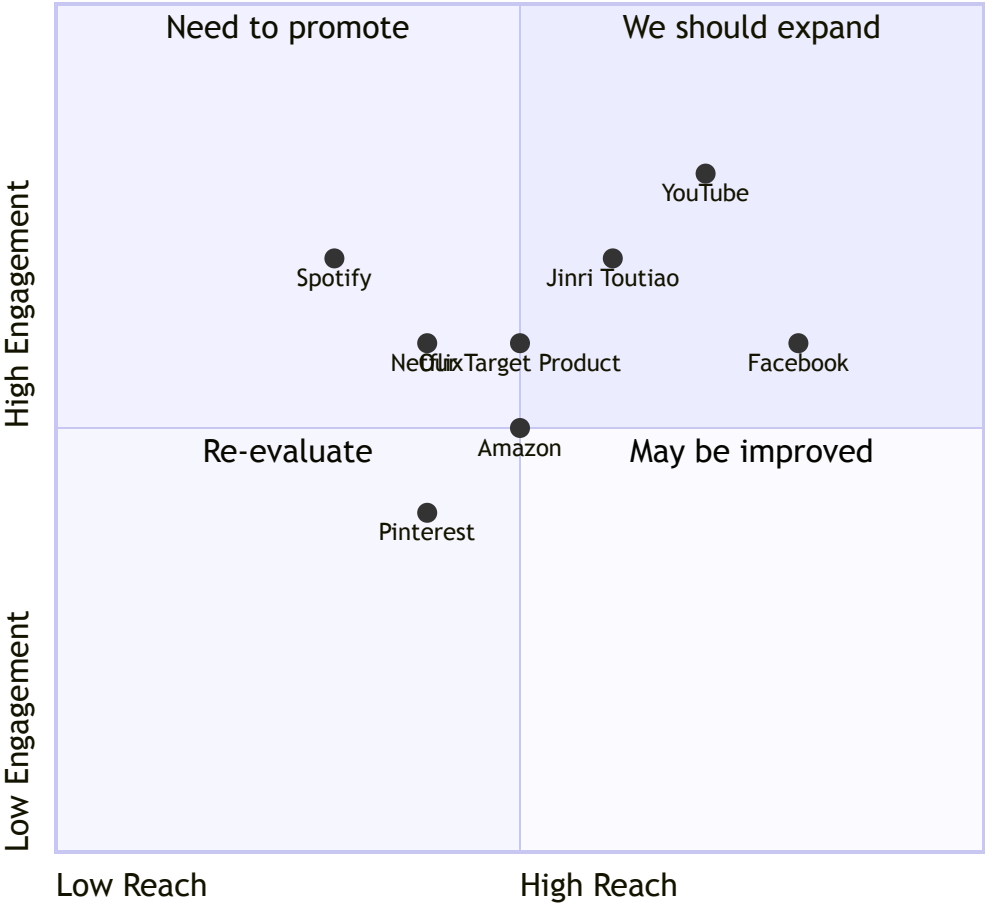

Supplement: supplementary_material [file attachment]

# Reach and Engagement of Match-3 Games

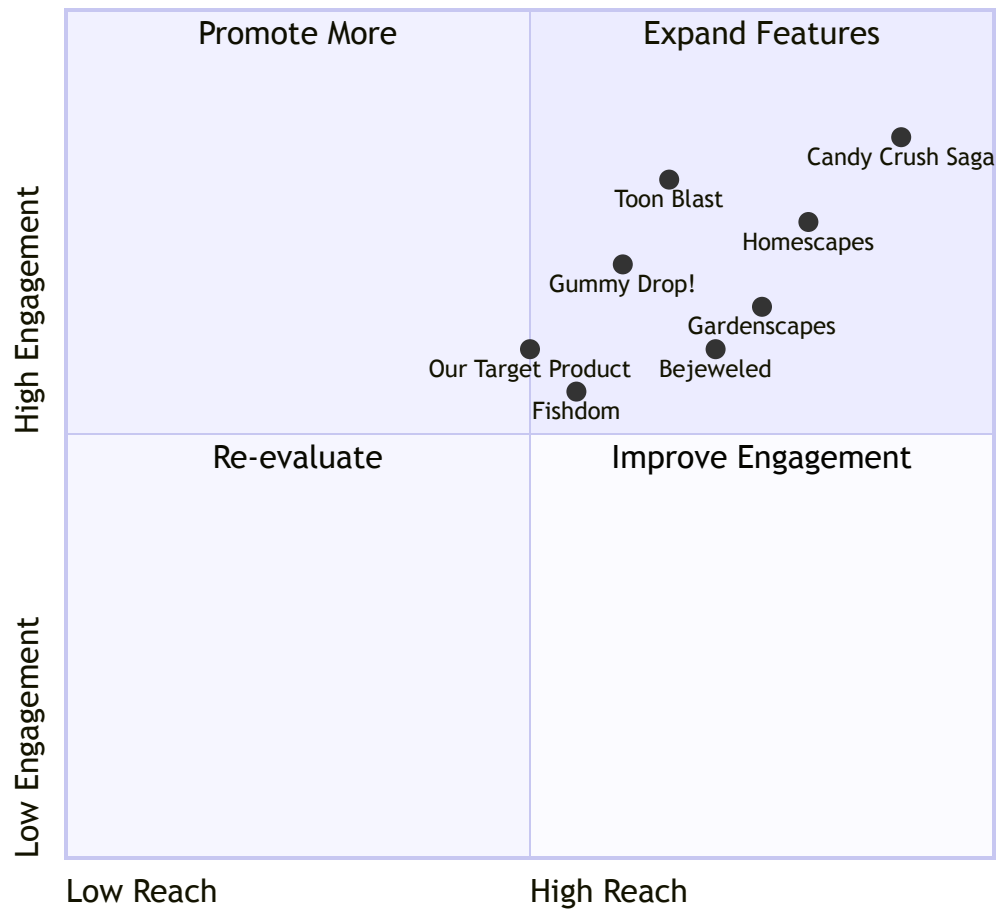

Supplement: supplementary_material [file attachment]

# MLOps/LLMOps Frameworks for GPT-4 and LLMs

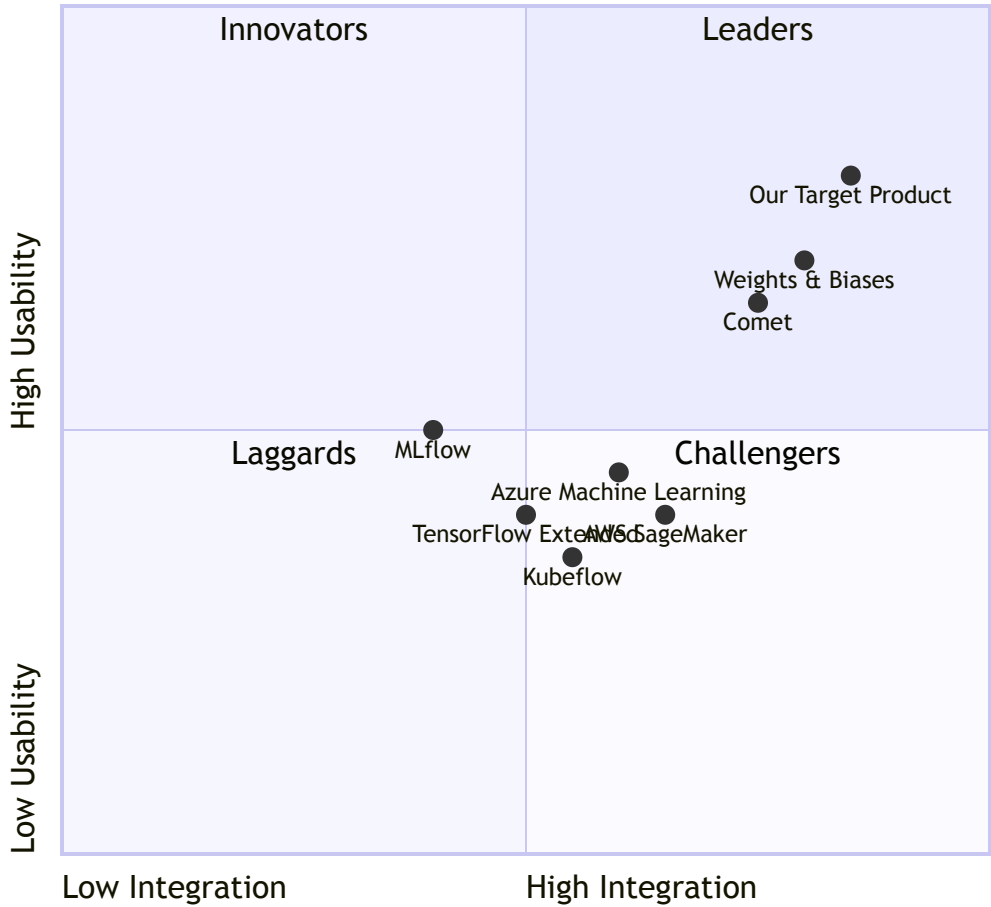

Supplement: supplementary_material [file attachment]

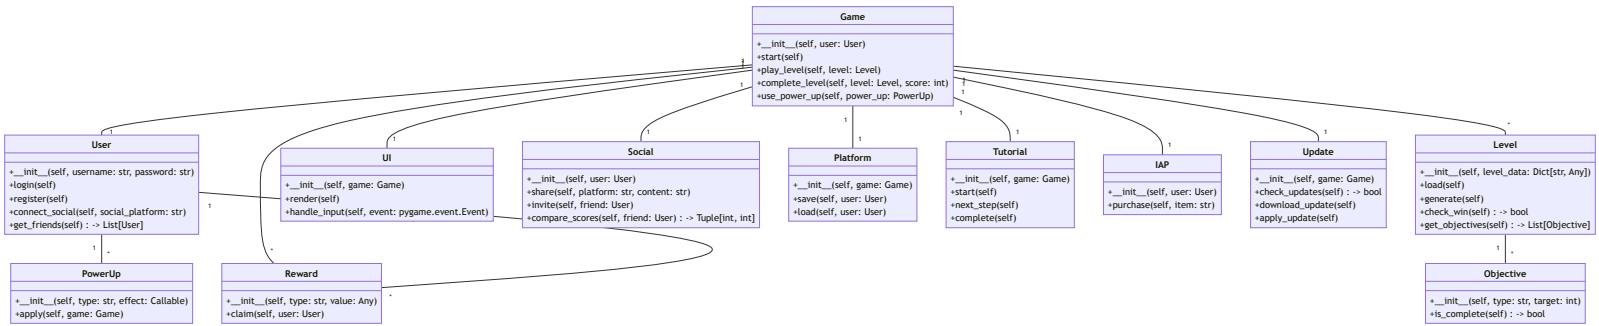

Supplement: supplementary_material [file attachment]

# Reach and Engagement of Roguelike Games

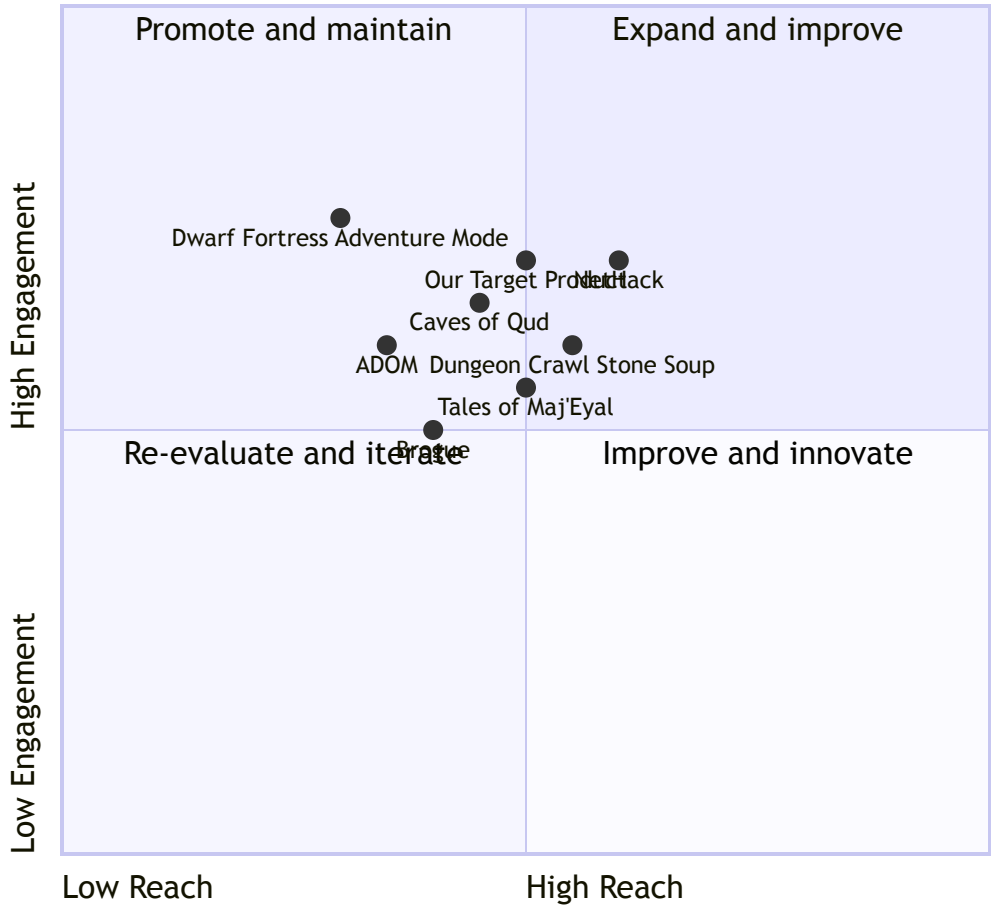

Supplement: supplementary_material [file attachment]

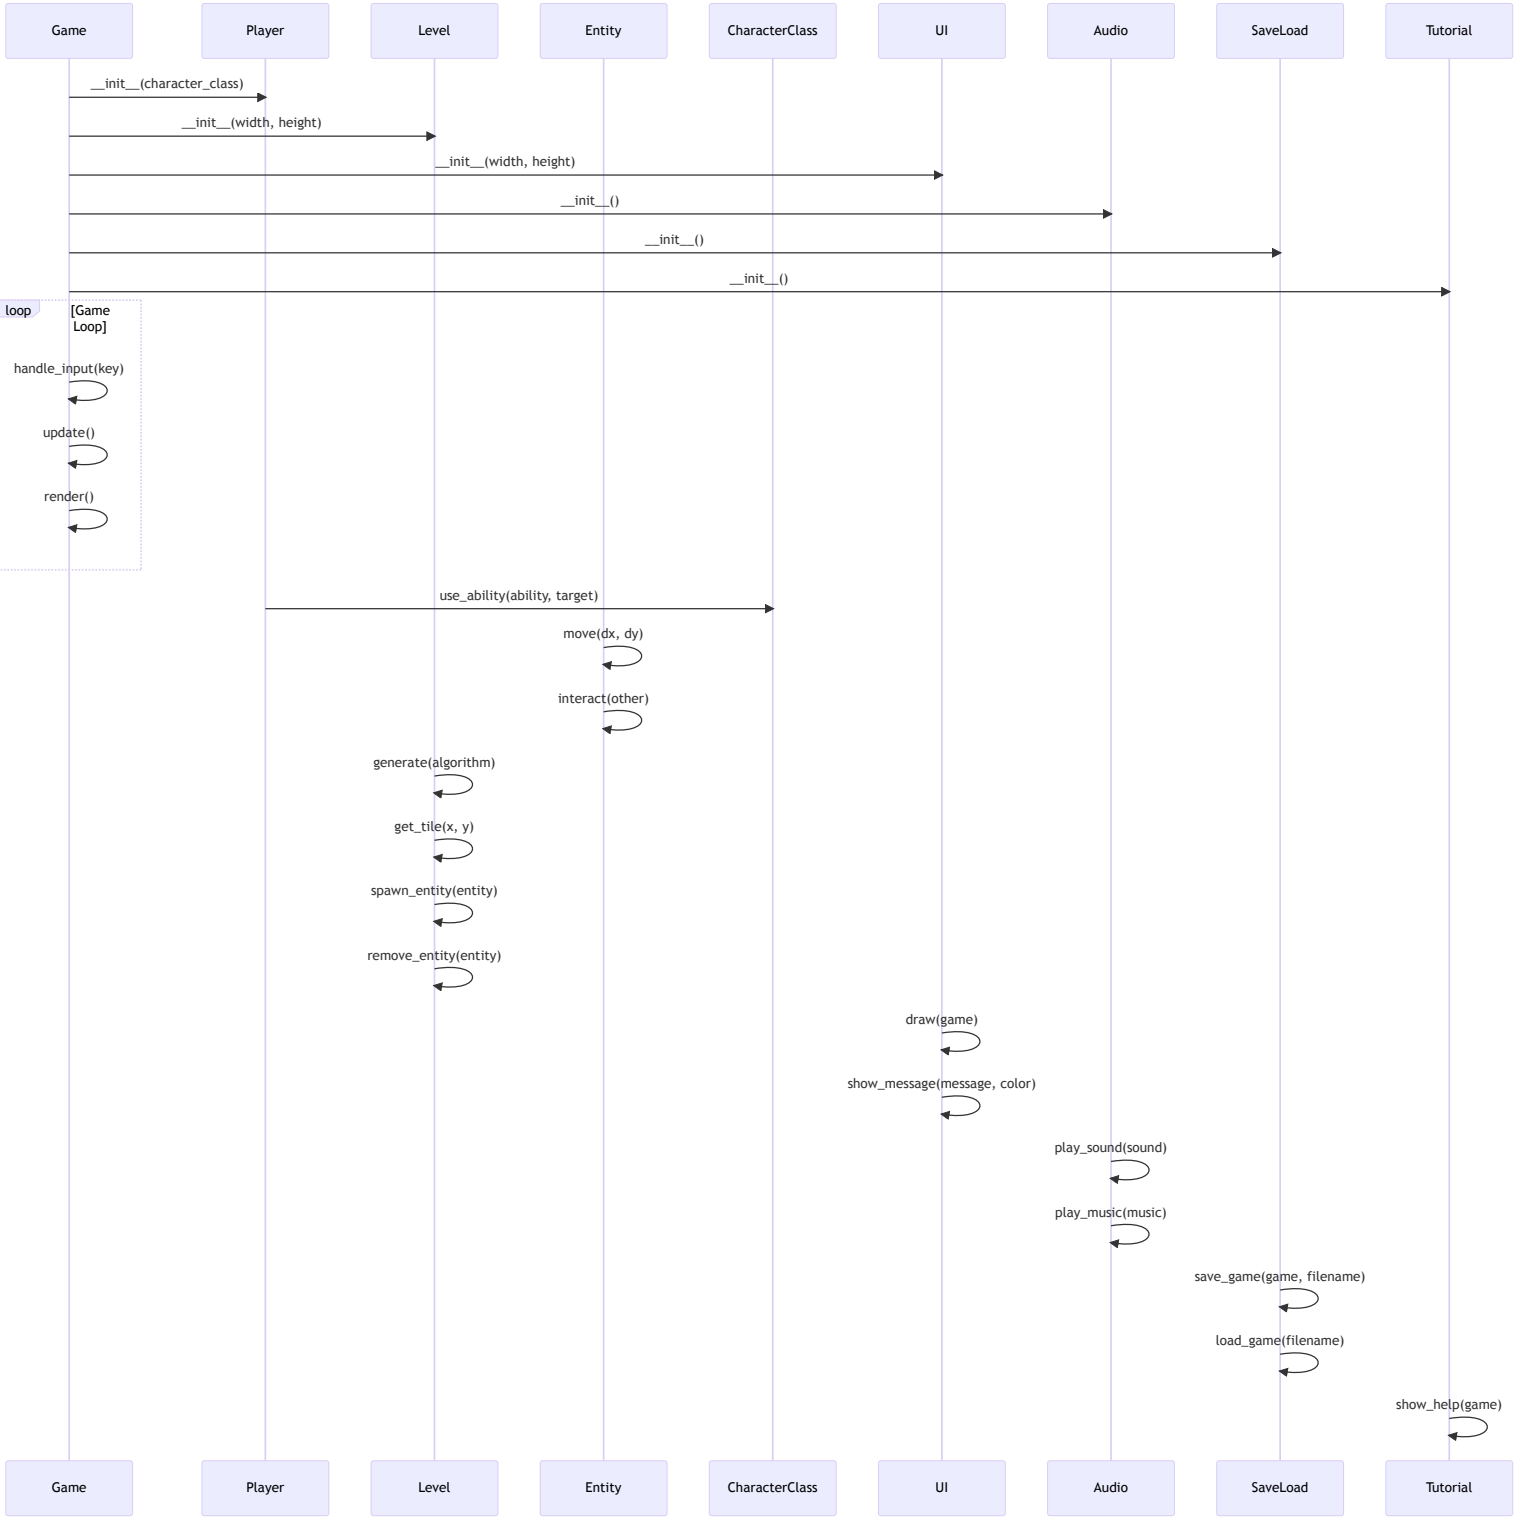

Supplement: supplementary_material [file attachment]

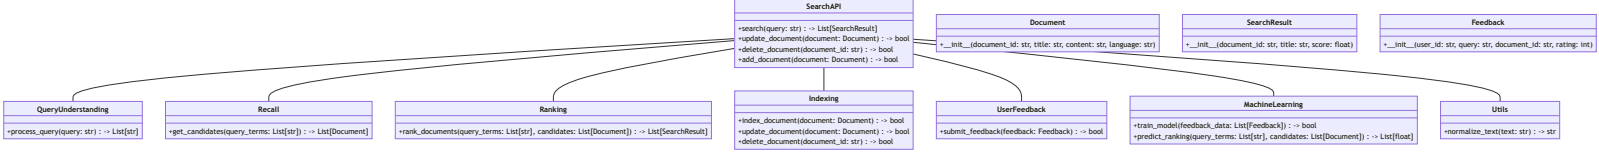

Supplement: supplementary_material [file attachment]

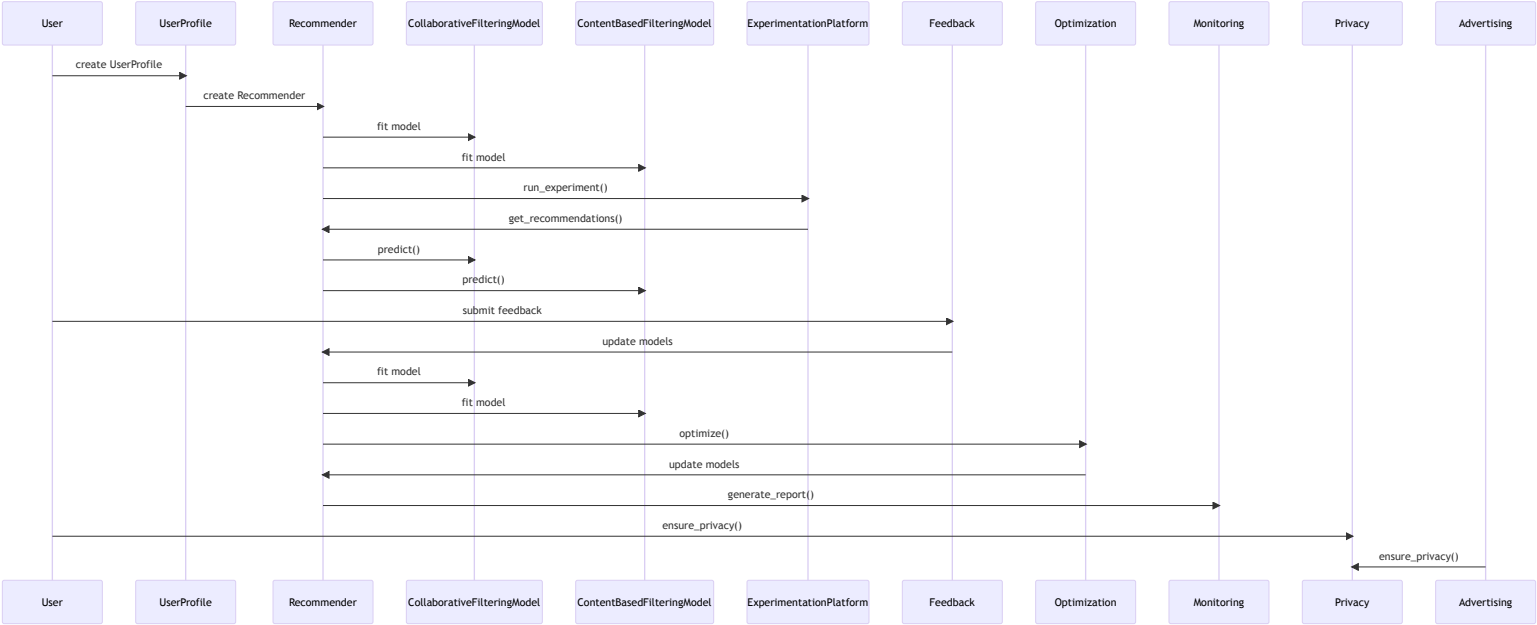

Supplement: supplementary_material [file attachment]

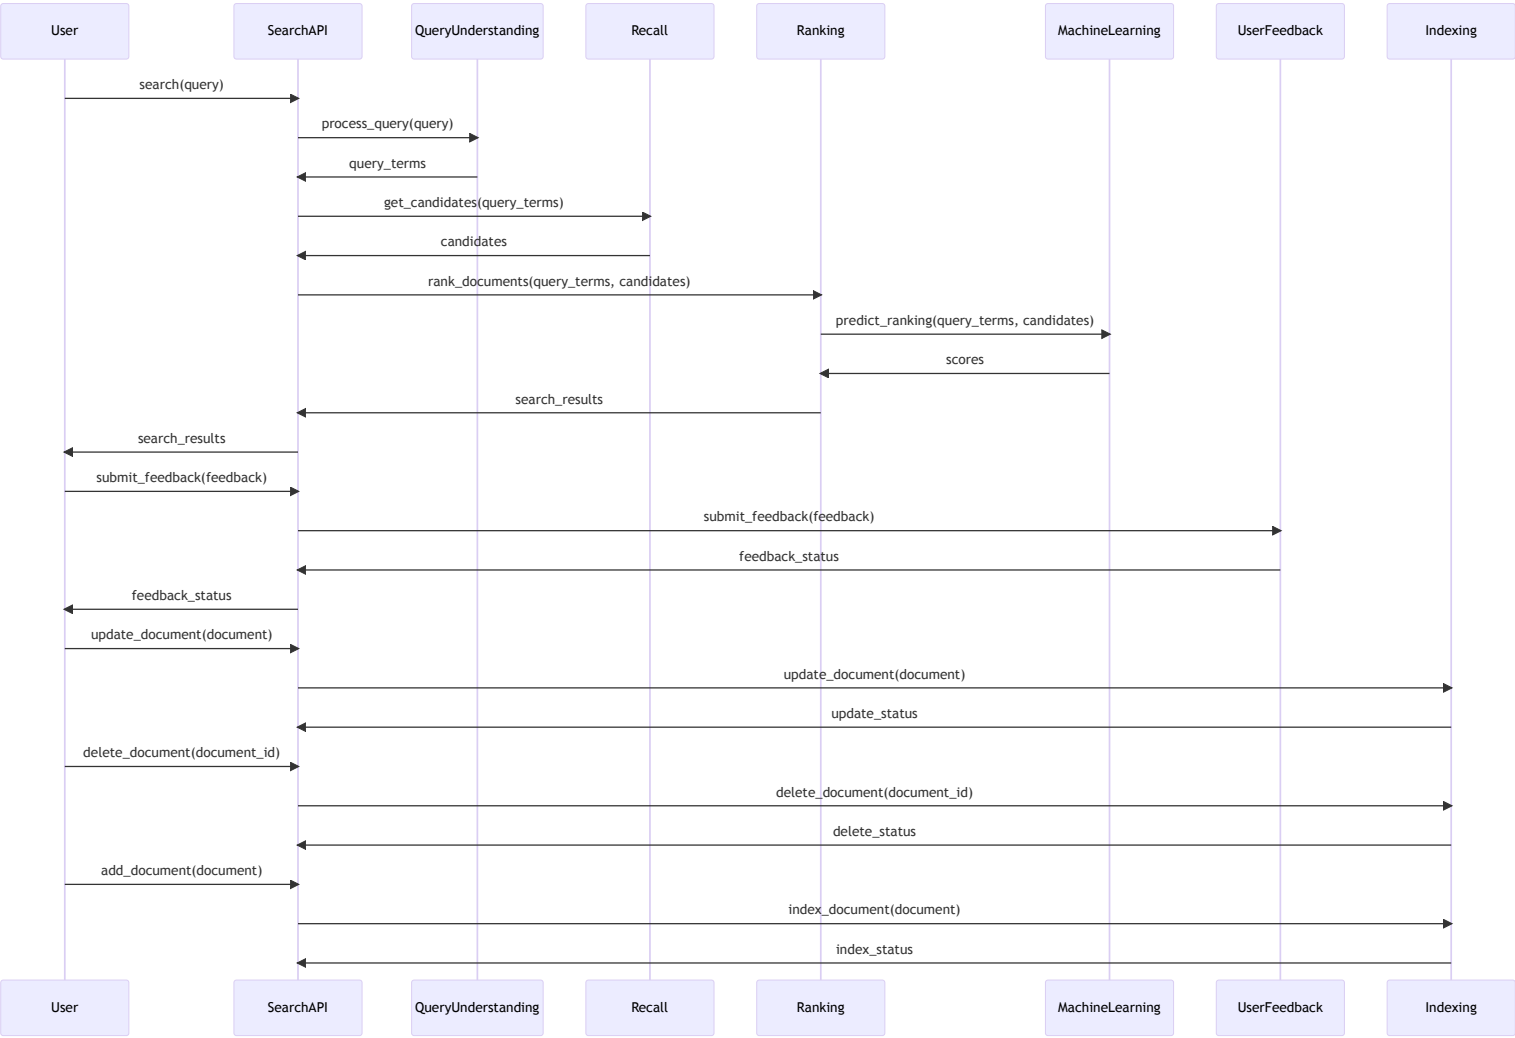

Supplement: supplementary_material [file attachment]

# Competitive Analysis of Pomodoro Timers

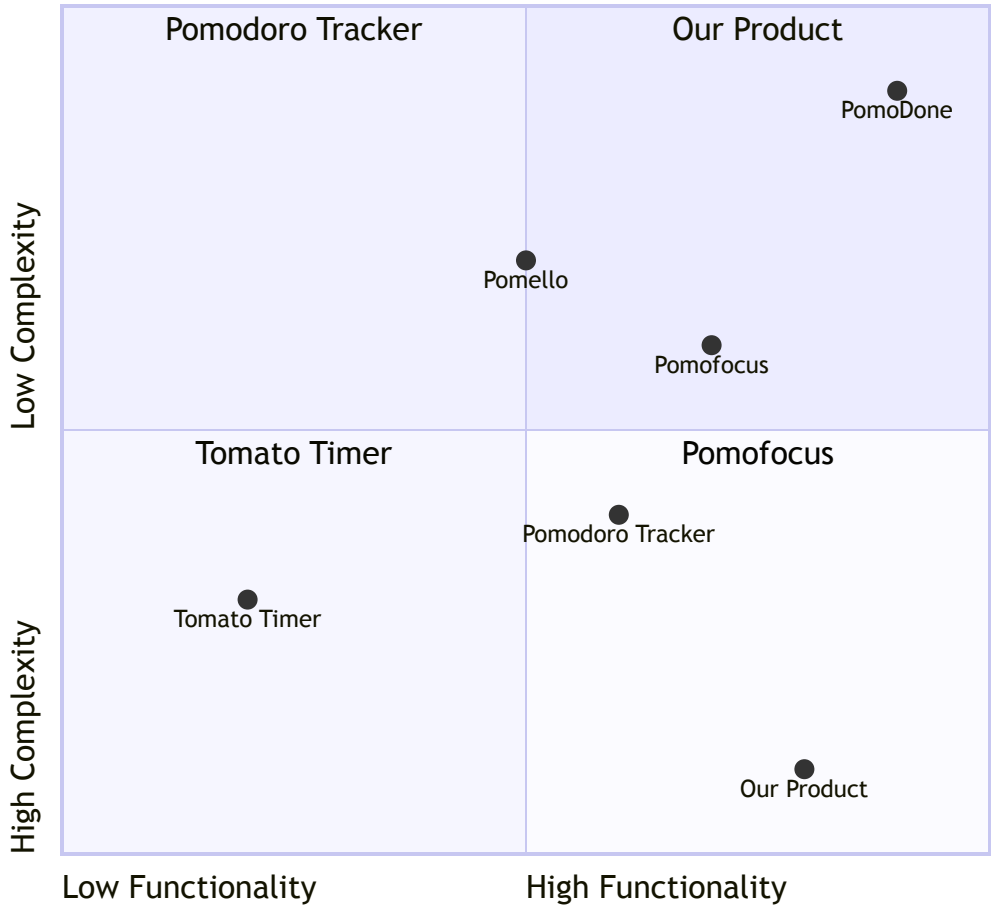

Supplement: supplementary_material [file attachment]

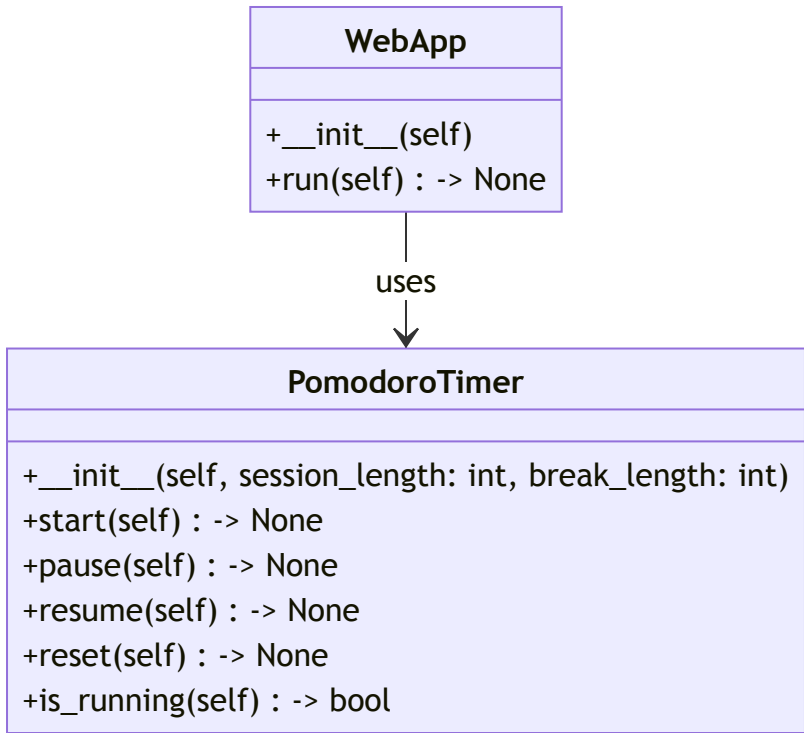

Supplement: supplementary_material [file attachment]

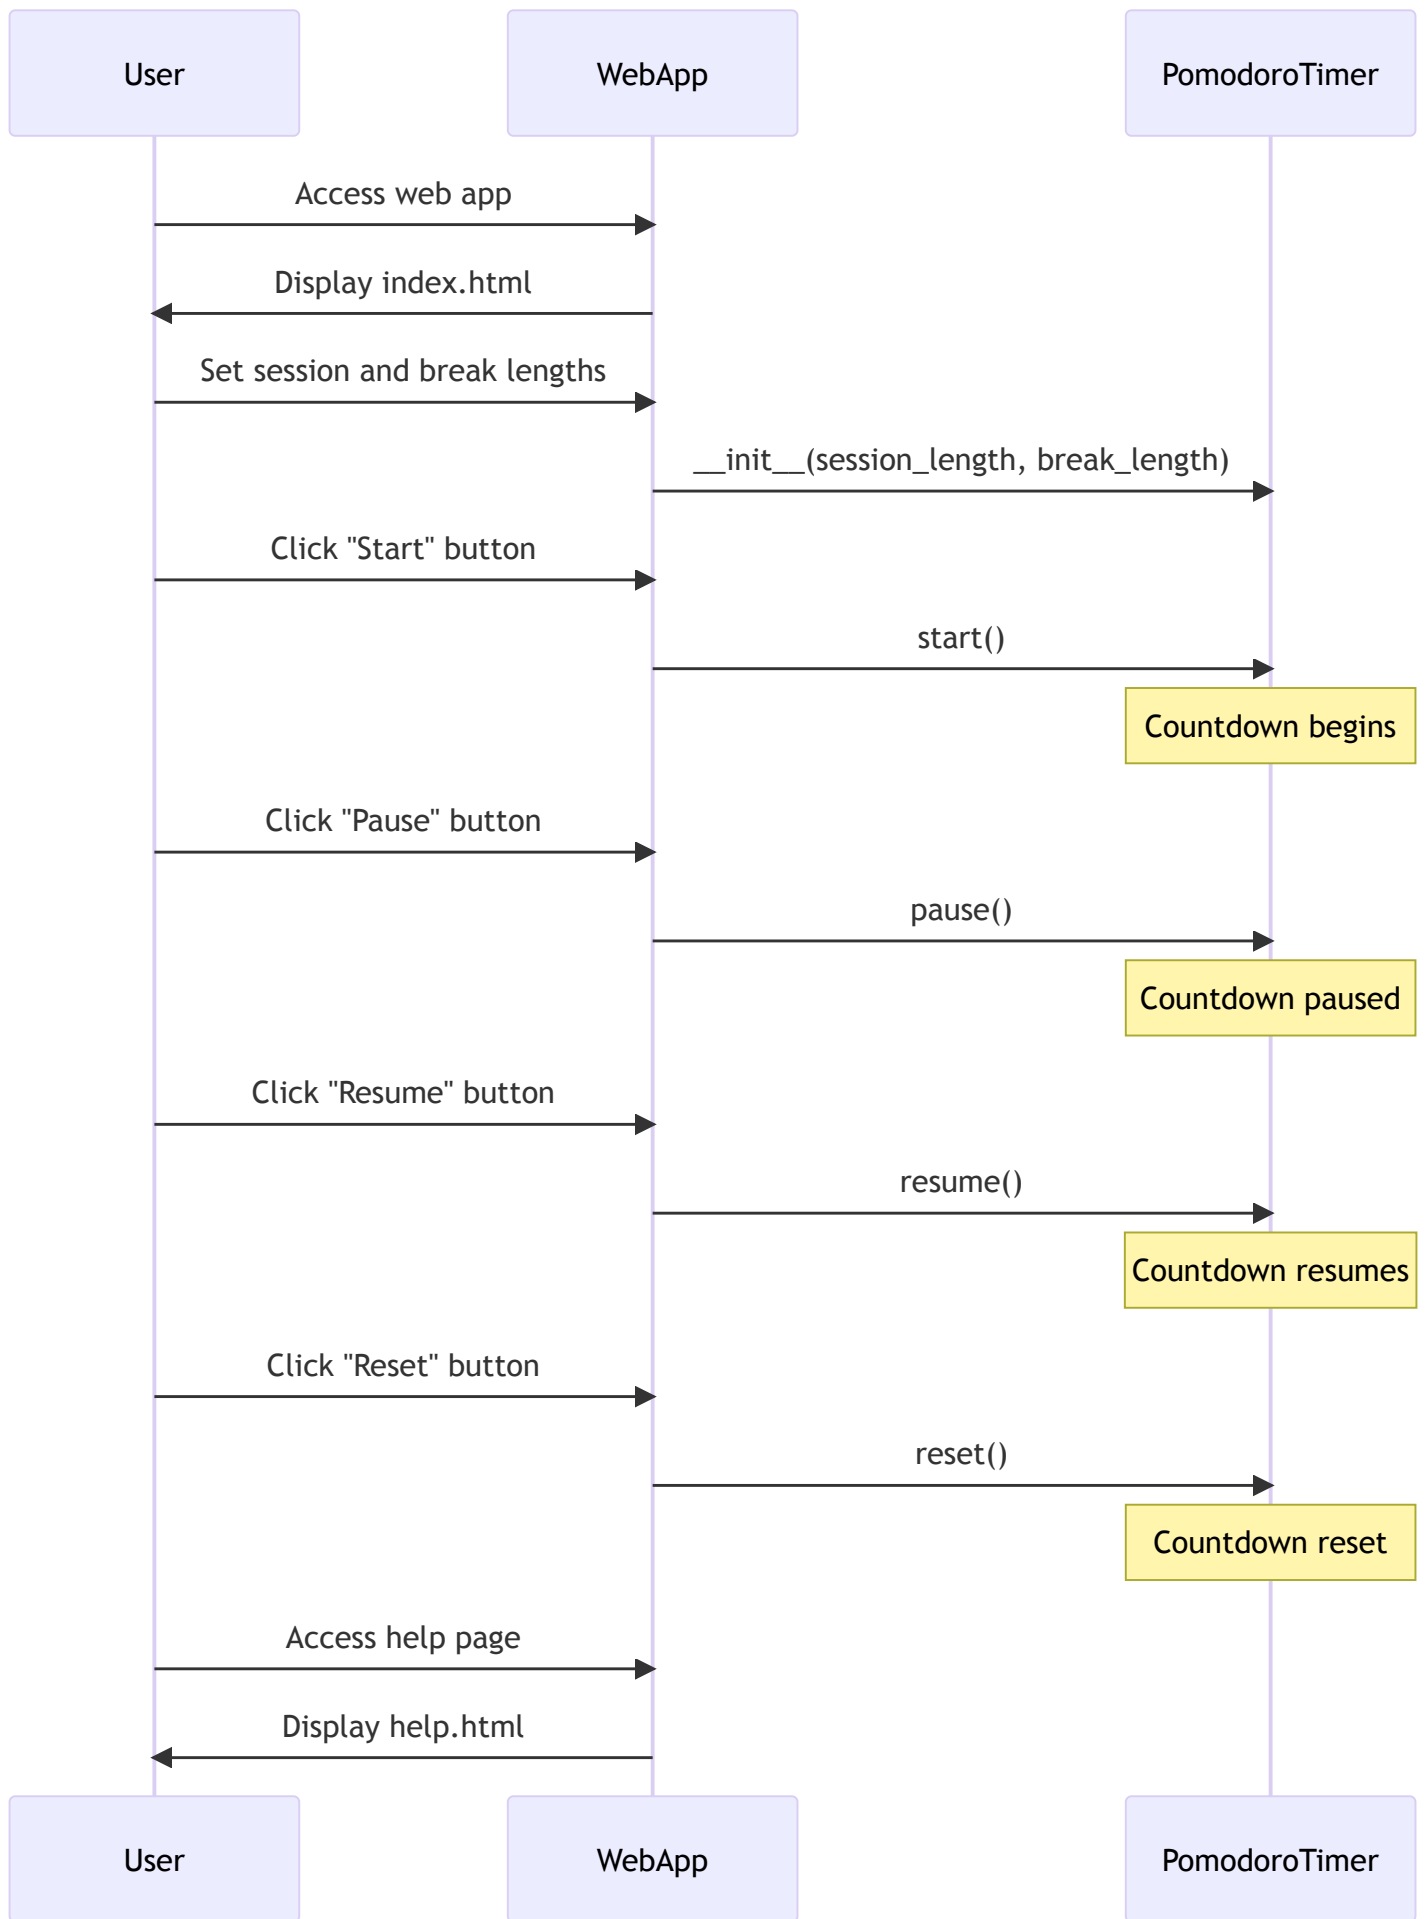

Supplement: supplementary_material [file attachment]

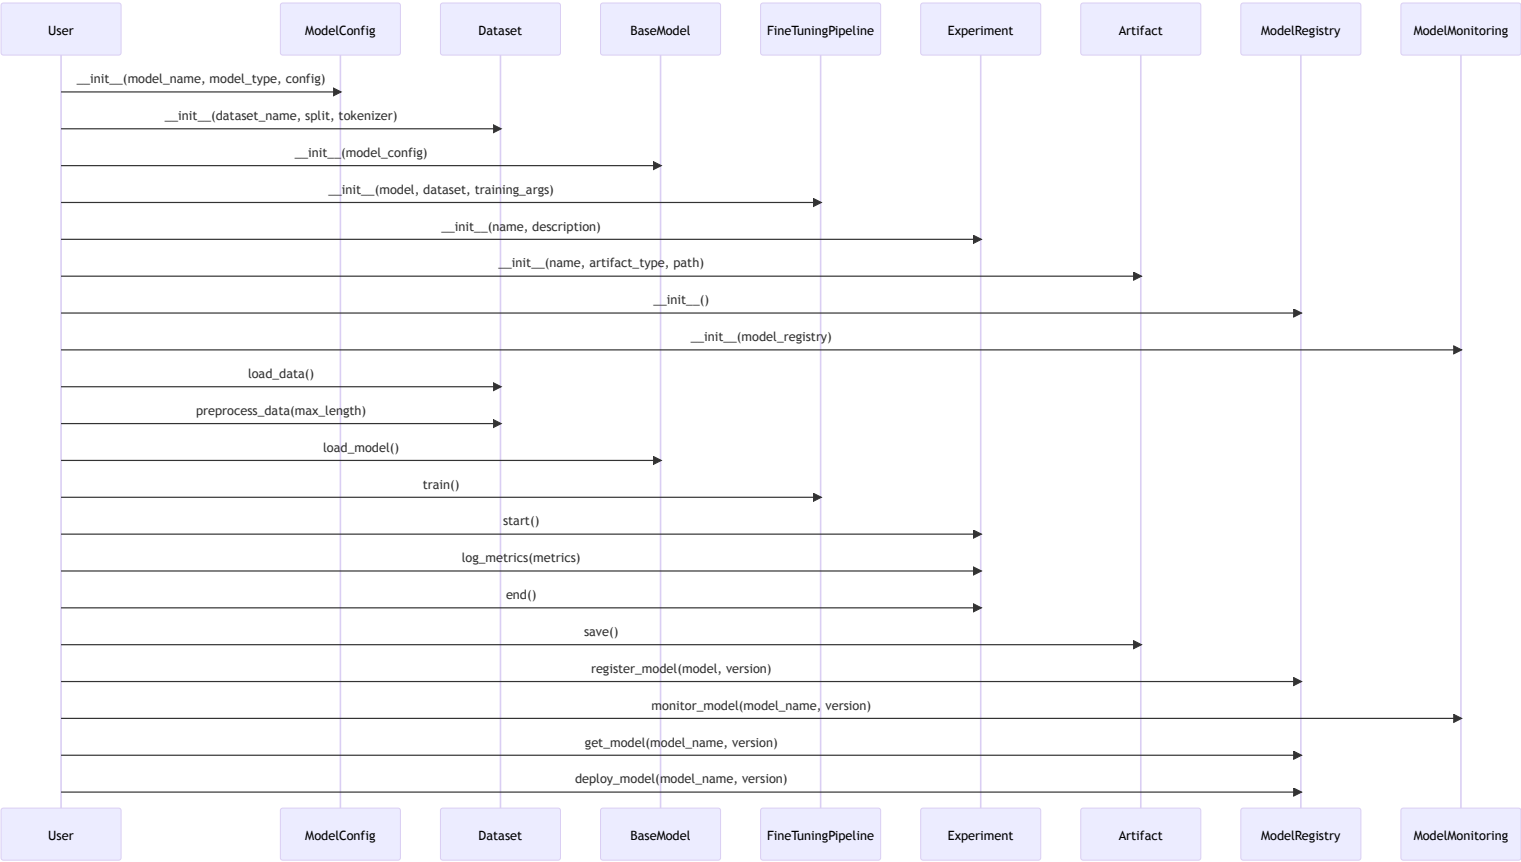

Supplement: supplementary_material [file attachment]

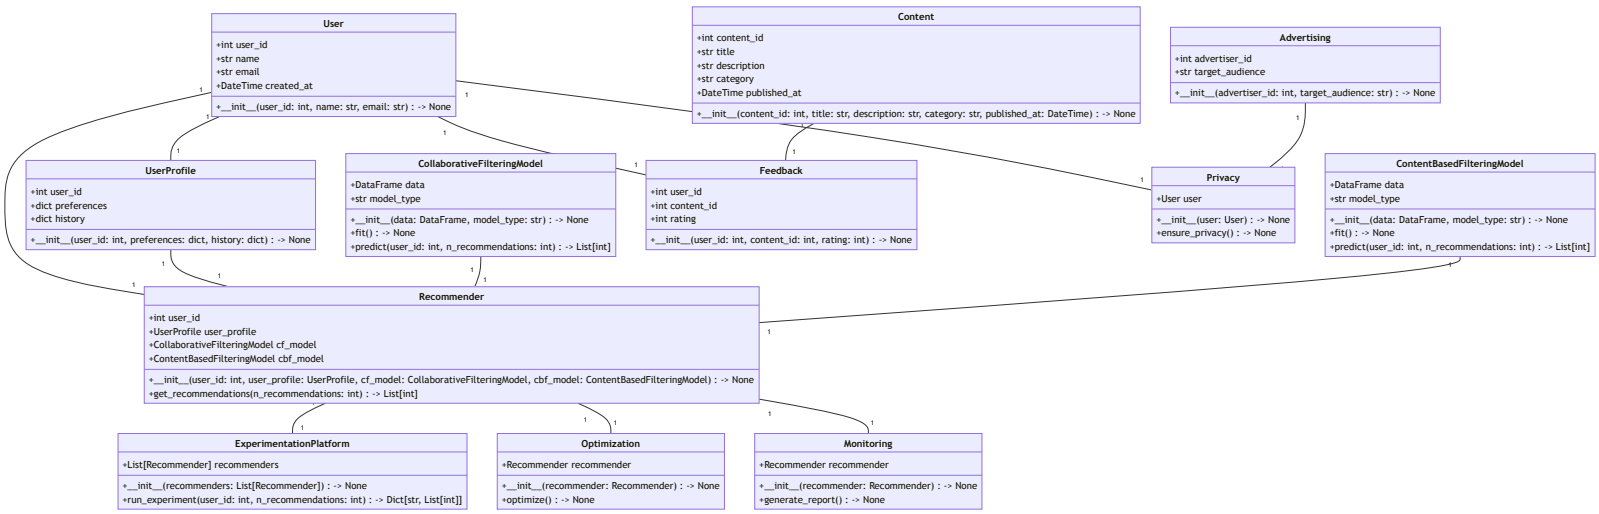

Supplement: supplementary_material [file attachment]
